# Supplementary material for: Career-Success Scale – A new instrument to assess young physicians' academic career steps
Source: BMC Health Serv Res. 2008 Jun 2;8:120. doi: 10.1186/1472-6963-8-120 (PMC2442432; doi:10.1186/1472-6963-8-120)
Supplement: Additional file 1 — Career-Success Scale English and German version. The wording of the 7 items of the Career-Success Scale are given in English and in German. [file 1472-6963-8-120-S1.pdf]

## Career-Success Scale (CSS) English version

*Looking at your career, what career steps have you made until now?*

|                                                                                                              |     |                                       |                           |
|--------------------------------------------------------------------------------------------------------------|-----|---------------------------------------|---------------------------|
| 1. Lectures and talks held at conferences and scientific meetings (without advanced training in your clinic) | No  | <input type="checkbox"/> <sub>0</sub> |                           |
|                                                                                                              | Yes | <input type="checkbox"/> ⇒            | How many?                 |
| 2. Publications (original papers with peer review, first-authorship or co-authorship)                        | No  | <input type="checkbox"/> <sub>0</sub> |                           |
|                                                                                                              | Yes | <input type="checkbox"/> ⇒            | How many?                 |
| 3. Collaboration in a larger research project                                                                | No  | <input type="checkbox"/> <sub>0</sub> |                           |
|                                                                                                              | Yes | <input type="checkbox"/> <sub>1</sub> |                           |
| 4. Research as principal activity                                                                            | No  | <input type="checkbox"/> <sub>0</sub> |                           |
|                                                                                                              | Yes | <input type="checkbox"/> ⇒            | How many months in total? |
| 5. Scholarship awarded                                                                                       | No  | <input type="checkbox"/> <sub>0</sub> |                           |
|                                                                                                              | Yes | <input type="checkbox"/> <sub>1</sub> |                           |
| 6. Competitively gained third party funds for research                                                       | No  | <input type="checkbox"/> <sub>0</sub> |                           |
|                                                                                                              | Yes | <input type="checkbox"/> <sub>1</sub> |                           |
| 7. Research awards                                                                                           | No  | <input type="checkbox"/> <sub>0</sub> |                           |
|                                                                                                              | Ja  | <input type="checkbox"/> <sub>1</sub> |                           |

## Career-Success Scale (CSS) German version

*Wenn Sie Ihre berufliche Laufbahn überblicken, welche Leistungen haben Sie bis jetzt erbracht?*

|                                                                                                          |            |                                                                                |                               |
|----------------------------------------------------------------------------------------------------------|------------|--------------------------------------------------------------------------------|-------------------------------|
| 1. Eigene Fachvorträge an Konferenzen, Kongressen, Tagungen (ohne Klinik-interne Fortbildungen) gehalten | Nein<br>Ja | <input type="checkbox"/> <sub>0</sub><br><input type="checkbox"/> ⇒            | Wie viele?                    |
| 2. Eigene Publikationen (Originalarbeiten mit peer-review, Erst- oder Mitautorenschaft) verfasst         | Nein<br>Ja | <input type="checkbox"/> <sub>0</sub><br><input type="checkbox"/> ⇒            | Wie viele?                    |
| 3. Mitarbeit in einem grösseren Forschungsprojekt                                                        | Nein<br>Ja | <input type="checkbox"/> <sub>0</sub><br><input type="checkbox"/> <sub>1</sub> |                               |
| 4. Forschung als Haupttätigkeit                                                                          | Nein<br>Ja | <input type="checkbox"/> <sub>0</sub><br><input type="checkbox"/> ⇒            | Wie viele Monate gesamthaft ? |
| 5. Forschungsstipendium                                                                                  | Nein<br>Ja | <input type="checkbox"/> <sub>0</sub><br><input type="checkbox"/> <sub>1</sub> |                               |
| 6. Drittmittel für Ihre Forschungstätigkeit eingeworben (Nationalfonds, Stiftungen, Industrie)           | Nein<br>Ja | <input type="checkbox"/> <sub>0</sub><br><input type="checkbox"/> <sub>1</sub> |                               |
| 7. Forschungsauszeichnung (z.B. Forschungspreise) erhalten                                               | Nein<br>Ja | <input type="checkbox"/> <sub>0</sub><br><input type="checkbox"/> <sub>1</sub> |                               |
